# Supplementary material
Source: PubMed Central journal article supplement (PMC3622951)
Supplement: NIHMS454247-supplement-SuppFigs.pdf [file NIHMS454247-supplement-SuppFigs.pdf]

# SUPPLEMENTAL FIGURE 1

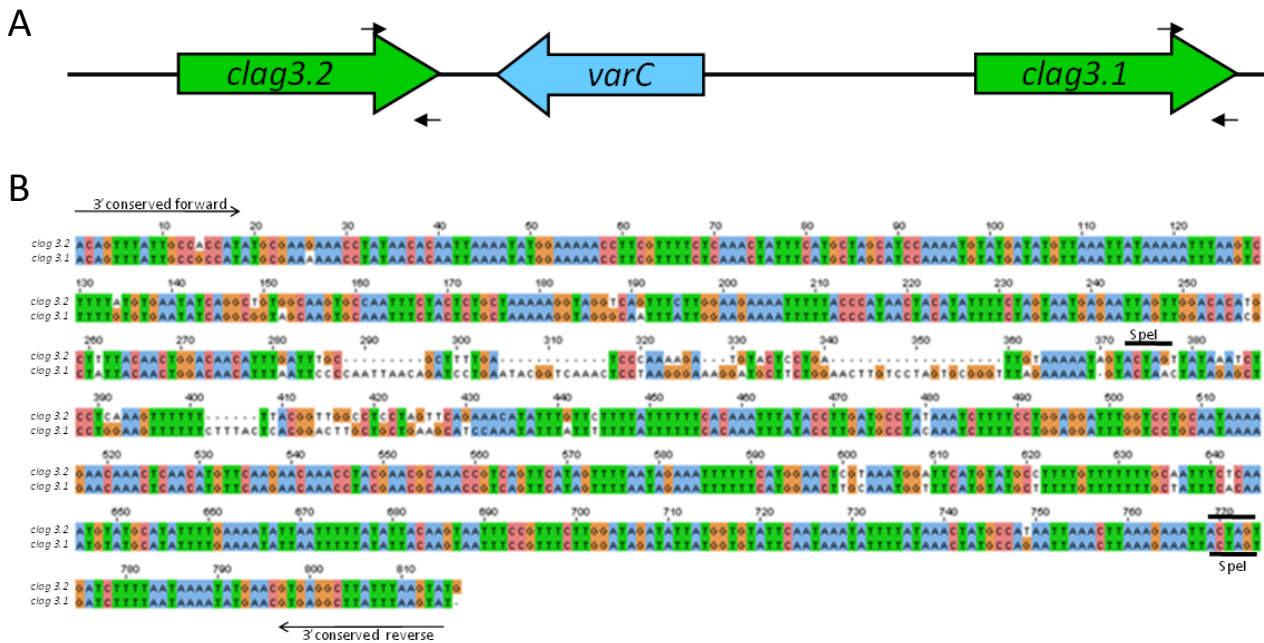

**Supplemental figure 1: Schematic of *clag 3* PCR-RFLP assay.**

A. Diagram of the chromosome 3 region containing both *clag 3* paralogs with the 3' region amplified from each *clag 3* gene with conserved primers marked with thin black arrows.

B. Sequence alignment of the resulting amplicon of *clag 3.1* and *clag 3.2*, with primer binding regions and sites of restriction enzymes used in assay denoted. A *SpeI* site that is present in both sequences is marked by a black line both above and below the sequence, whereas the unique *SpeI* site found only in *clag 3.2* is denoted by a single black line.

# SUPPLEMENTAL FIGURE 2

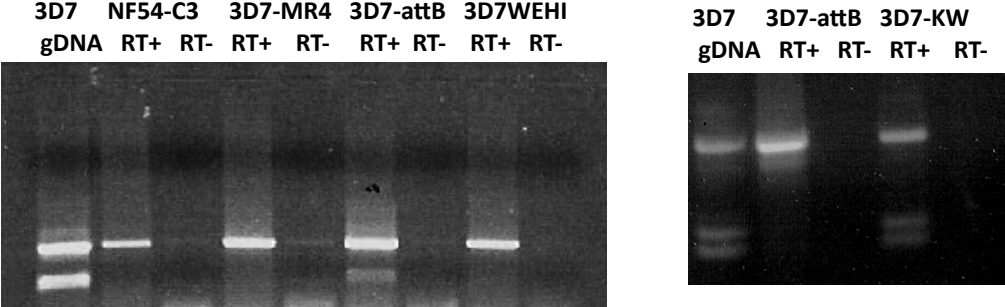

**Supplemental figure 2: Screen of 4 3D7 isogenic lines (3D7 sources and NF54) for clag 3.2 expression.** Only 3D7-attB appears to express a low level of 3.2. Further experimentation with 3D7attB after additional time in culture (6 weeks between these gels) revealed only minimal 3.2 expression; B. An additional source of 3D7 (3D7-KW) expressed clag 3.1 and clag 3.2 in an approximately 1:1 ratio, making recovering clag 3.2 expressing clones more feasible.

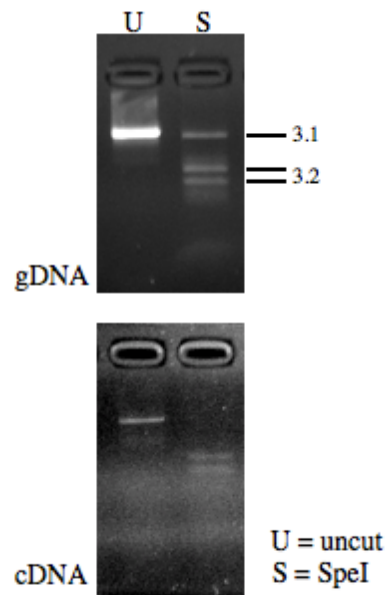

**Supplementary Figure 3.** RFLP analysis of Clag3.1 and Clag3.2 from the parasite strain T9/94. Top panel. RFLP (digestion with SpeI) of Clag 3 amplified from genomic DNA. Restriction digestion reveals one copy of Clag 3.1 and one copy of Clag 3.2 Lower panel. RFLP (digestion with SpeI) of Clag 3 amplified from schizont cDNA of T9/94. Only clag 3.2 is expressed.

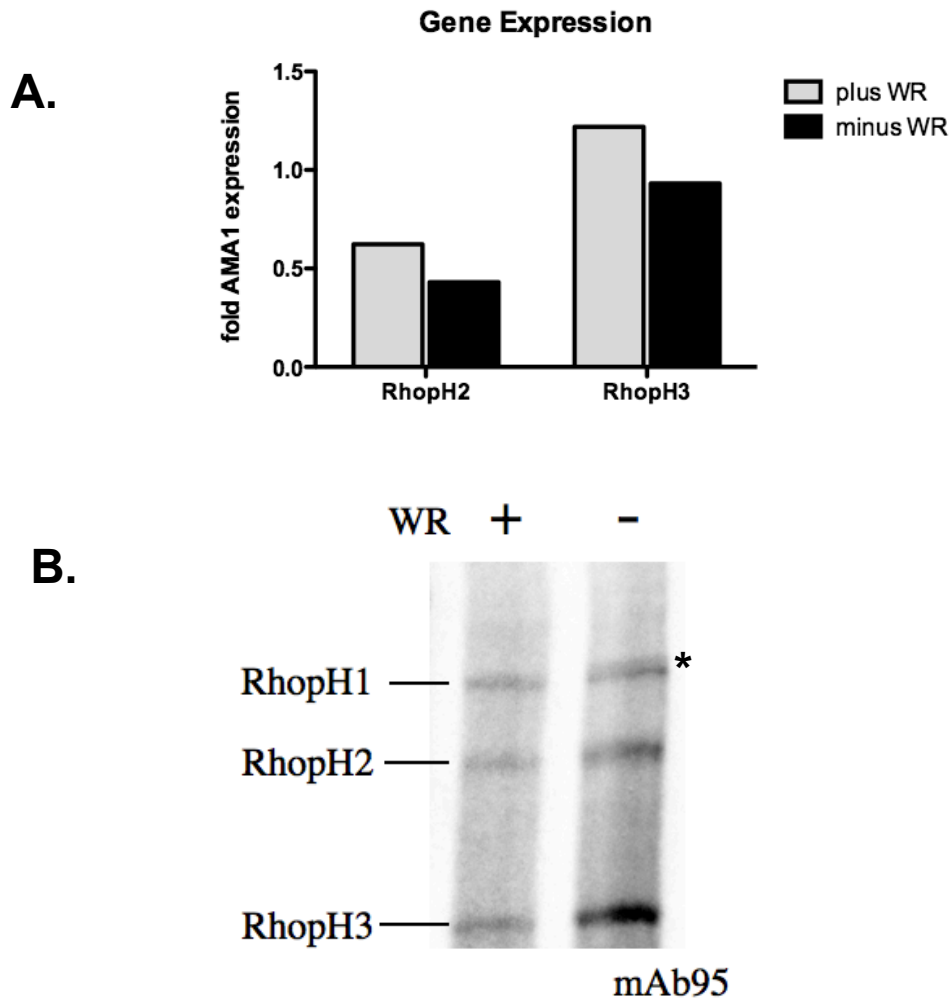

**Supplementary Figure 4.**

A. RhopH2 and RhopH3 expression is unchanged in Clag3.2ins cl5 WR + and WR- lines

B. Immunoprecipitation of RhopH complex members with antibodies specific to RhopH2 (mAb95). This was carried out by the method described in Baldi et al. *Infection & Immunity*, 70, 5236-45, 2002.

\*:Clag 3.1 band that is only present in WR- and not in WR+. Quantity of members of RhopH1 complex does not change in Clag3.2 cl5 WR + and WR- lines. Clag3.1 is lost in the Clag3.2 cl5 WR +, IPed with mAb95 (described in Doury et al. *Parasitology*, 108, 269-280,1994, a kind gift from Dr. Dubremetz INSERM, France).

## SUPPLEMENTAL TABLE 1: qRT-PCR primers for measuring RhopH expression levels

| Primer name  | Gene             | Sequence (5'→3')                               |
|--------------|------------------|------------------------------------------------|
| clag2ccF/R   | PFB0935w         | gaagtgtttctaaatgacag<br>catcggattatctgattgag   |
| clag3.1ccF/R | PFC0120w (5'UTR) | tggacaaatagattttgtac<br>gtacagaattgaatagtac    |
| clag3.2ccF/R | PFC0110w (5'UTR) | ggatcatcatcggattgtac<br>ccgtattcaaaaaggagtacac |
| clag8ccF/R   | MAL7P1.229       | ctgtcgacatatgtag<br>gccttactatttgacg           |
| clag9ccF/R   | PFI1730w         | ggctatgtcaagagct<br>ggagtaatgtcagtacc          |
| RhopH2ccF/R  | PFI1445w         | cacatatcttacagaacc<br>ttggatcctcagatac         |
| RhopH3ccF/R  |                  |                                                |
| AMA1F/R      | PF11_0344        | tcccatcccatcgaagttgaa<br>tgatgcaattataatttcat  |

## Supplemental table: qPCR primers for *clag 3* ChIP assays

| Primer name | Relative position to region's genes                  | Sequence (5'→3')                                        |
|-------------|------------------------------------------------------|---------------------------------------------------------|
| c3chip1F/R  | Far upstream <i>clag3.2</i>                          | acgatgatgattacgaggag<br>gatcagcatcatgttcttgtc           |
| c3chip2F/R  | Far upstream <i>clag3.2</i>                          | atagagatgaccagaatg<br>ctgtatatatttacttgtag              |
| c3chip3F/R  | Close upstream <i>clag3.2</i>                        | ggatcatcatcggattgtac<br>ccgtattcaaaaaggagtacac          |
| c3chip4F/R  | Within 3' coding region of <i>clag 3.2</i>           | atcccaaaagatgtactcctg<br>gtttctgaactaggaggccaa          |
| c3chip5F/R  | Within 3' coding region of <i>varC</i><br>pseudogene | cgattagtactaatcgttattg<br>gttgagatctcaatcg              |
| c3chip6F/R  | Middle coding region of <i>varC</i><br>pseudogene    | cgtgccattccatcaacca<br>cgaactaccaaaaacatcacc            |
| c3chip7F/R  | Upstream <i>varC</i> /far upstream <i>clag 3.1</i>   | ctataataaatccattattgc<br>gaatggttattaactattatg          |
| c3chip8F/R  | Upstream <i>varC</i> /far upstream <i>clag 3.1</i>   | tctgcaggttttatatattcc<br>tcattcagatggagaaaatg           |
| c3chip9F/R  | Upstream <i>varC</i> /far upstream <i>clag 3.1</i>   | gagacagctgtatcaccca<br>cacaaaacattttaggtgtcatg          |
| c3chip10F/R | Upstream <i>clag 3.1</i> / far upstream <i>varC</i>  | agaatccttgtgcaatac<br>gcacttaattcttgttgac               |
| c3chip11F/R | Upstream <i>clag 3.1</i> / far upstream <i>varC</i>  | caataacgtattaggaatgttac<br>gtagttacgtaaacgtttc          |
| c3chip12F/R | Upstream <i>clag 3.1</i> / far upstream <i>varC</i>  | taaacataagagggtga<br>cattcgagaatatatg                   |
| c3chip13F/R | Upstream <i>clag 3.1</i> / far upstream <i>varC</i>  | tggacaaatagattttgtac<br>gtacagaattgaatagtac             |
| c3chip14F/R | Within 3' coding region of <i>clag 3.1</i>           | gtcccaagttctactgctaag<br>cttcagcagcaagtccgtgagtgaa<br>g |
